# Supplementary material
Source: HighWire-hosted journal article supplement (https://jnm.snmjournals.org/highwire/filestream/104778/field_highwire_adjunct_files/0/253096_Supplemental_Data.pdf)
Supplement: 253096_Supplemental_Data.pdf [file 253096_Supplemental_Data.pdf]

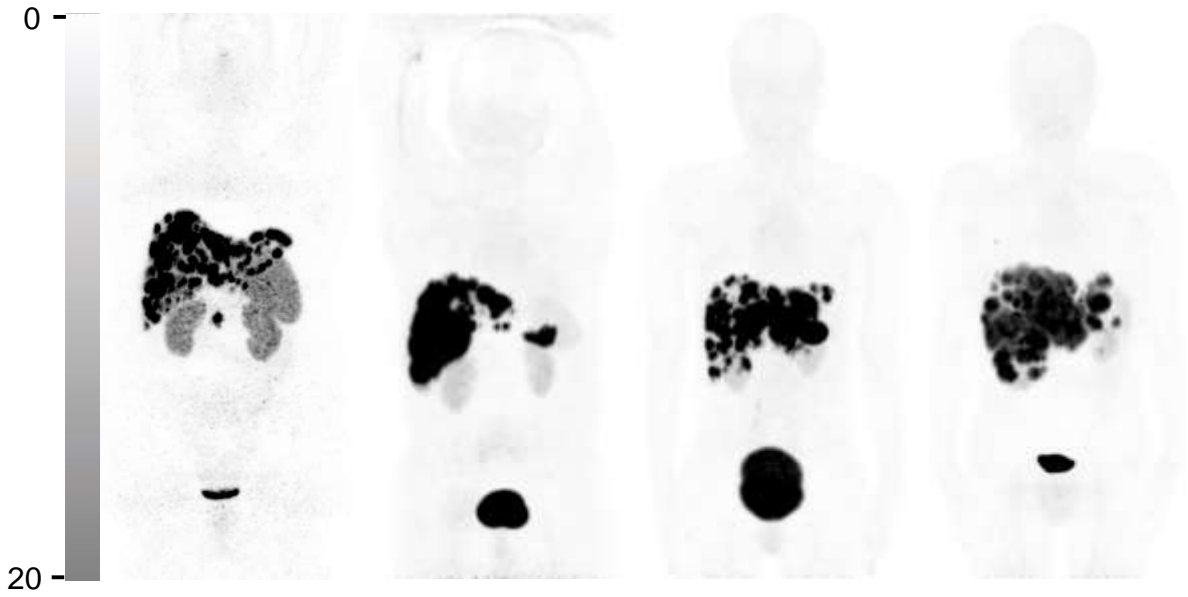

Supplemental Figure 1. Four patients (from left to right: patient #1 in arm A, and patient #2, #7, #16 in arm B) with fulminant hepatic metastases.

Supplemental Table 1. Inclusion and exclusion criteria

| Inclusion Criteria                                                                                                                                                                                                                                                                                                                                                                                                                                                                                                                                                                                                                                                                                                                                                                                                                                                                                                                                                                                                                                                                                                                                                                                                                                                                                                                                                          |
|-----------------------------------------------------------------------------------------------------------------------------------------------------------------------------------------------------------------------------------------------------------------------------------------------------------------------------------------------------------------------------------------------------------------------------------------------------------------------------------------------------------------------------------------------------------------------------------------------------------------------------------------------------------------------------------------------------------------------------------------------------------------------------------------------------------------------------------------------------------------------------------------------------------------------------------------------------------------------------------------------------------------------------------------------------------------------------------------------------------------------------------------------------------------------------------------------------------------------------------------------------------------------------------------------------------------------------------------------------------------------------|
| <ul style="list-style-type: none"> <li>• Written informed consent.</li> <li>• Patients of either gender, aged <math>\geq 18</math> years.</li> <li>• Histologically confirmed diagnosis of Metastatic, well-differentiated neuroendocrine tumor.</li> <li>• A diagnostic computed tomography (CT) or magnetic resonance imaging (MRI) of the tumor region within the previous 6 months prior to dosing day is available.</li> <li>• At least 1 measurable lesion based on RECIST v1.1.</li> <li>• Blood test results as follows (White blood cell: <math>\geq 3 \times 10^9/L</math>, Hemoglobin: <math>\geq 8.0</math> g/dL, Platelets: <math>\geq 50 \times 10^9/L</math>, Alanine aminotransferase / Aspartate aminotransferase / Alkaline phosphatase: <math>\leq 5</math> times upper limit of normal (ULN), Bilirubin: <math>\leq 3</math> times ULN)</li> <li>• Serum creatinine: within normal limits or <math>&lt; 120 \mu\text{mol/L}</math> for patients aged 60 years or older.</li> <li>• Calculated Glomerular filtration rate (GFR) <math>\geq 45</math> mL/min.</li> </ul>                                                                                                                                                                                                                                                                                  |
| Exclusion Criteria                                                                                                                                                                                                                                                                                                                                                                                                                                                                                                                                                                                                                                                                                                                                                                                                                                                                                                                                                                                                                                                                                                                                                                                                                                                                                                                                                          |
| <ul style="list-style-type: none"> <li>• Known hypersensitivity to Gallium-68, to NODAGA, to DOTA, to LM3, or to any of the excipients of Gallium-68 DOTA-LM3 or Gallium-68 NODAGA-LM3.</li> <li>• Presence of active infection at screening or history of serious infection within the previous 6 weeks.</li> <li>• Therapeutic use of any somatostatin analog, including long-acting Sandostatin (within 28 days) and short-acting Sandostatin (within 2 days) prior to study imaging. If a patient is on long-acting Sandostatin, then a wash-out phase of 28 days is required before the injection of the study drug. If a patient is on short-acting Sandostatin, then a wash-out phase of 2 days is required before the injection of the study drug.</li> <li>• Prior or planned administration of a radiopharmaceutical within 8 half-lives of the radionuclide used on such radiopharmaceutical including at any time during the current study.</li> <li>• Pregnant or breast-feeding women.</li> <li>• Current history of any malignancy other than neuroendocrine tumor; patients with a secondary tumor in remission of <math>&gt; 5</math> years can be included.</li> <li>• Any mental condition rendering the patient unable to understand the nature, scope and possible consequences of the study, and/or evidence of an uncooperative attitude.</li> </ul> |

Supplemental Table 2. The SUVmax and tumor-to-background ratios of 38 reference lesions

| Time after injection (minutes) | <sup>68</sup> Ga-NODAGA-LM3 (N = 18) | <sup>68</sup> Ga-DOTA-LM3 (N = 20) | P value |
|--------------------------------|--------------------------------------|------------------------------------|---------|
|                                | SUVmax                               |                                    |         |
| 5                              | 31.3 ± 19.7                          | 36.6 ± 23.6                        | 0.455   |
| 15                             | 40.4 ± 25.9                          | 41.9 ± 26.5                        | 0.860   |
| 30                             | 47.1 ± 31.0                          | 45.3 ± 29.3                        | 0.858   |
| 45                             | 54.9 ± 37.3                          | 46.6 ± 31.2                        | 0.461   |
| 60                             | 57.5 ± 39.4                          | 47.2 ± 32.6                        | 0.385   |
| 120                            | 74.6 ± 56.3                          | 46.1 ± 30.9                        | 0.058   |
|                                | Tumor-to-blood-pool ratio            |                                    |         |
| 5                              | 16.4 ± 11.7                          | 15.5 ± 10.0                        | 0.803   |
| 15                             | 28.0 ± 20.1                          | 22.8 ± 14.7                        | 0.366   |
| 30                             | 45.5 ± 38.6                          | 24.6 ± 15.8                        | 0.044   |
| 45                             | 58.8 ± 46.4                          | 32.0 ± 24.4                        | 0.038   |
| 60                             | 57.1 ± 38.9                          | 38.4 ± 29.1                        | 0.099   |
| 120                            | 74.8 ± 67.2                          | 41.5 ± 41.4                        | 0.071   |
|                                | Tumor-to-kidney ratio                |                                    |         |
| 5                              | 1.3 ± 0.7                            | 4.8 ± 3.4                          | <0.001  |
| 15                             | 2.0 ± 1.1                            | 7.6 ± 5.9                          | <0.001  |
| 30                             | 2.4 ± 1.4                            | 8.4 ± 6.3                          | <0.001  |
| 45                             | 3.0 ± 1.8                            | 10.3 ± 8.2                         | 0.001   |
| 60                             | 3.1 ± 1.9                            | 11.0 ± 9.6                         | 0.002   |
| 120                            | 4.0 ± 2.5                            | 10.3 ± 9.2                         | 0.008   |
|                                | Tumor-to-liver ratio                 |                                    |         |
| 5                              | 4.2 ± 2.8                            | 12.5 ± 7.7                         | <0.001  |
| 15                             | 6.2 ± 4.3                            | 16.4 ± 9.2                         | <0.001  |
| 30                             | 7.8 ± 5.8                            | 17.6 ± 9.9                         | 0.001   |
| 45                             | 9.4 ± 7.1                            | 18.6 ± 11.6                        | 0.006   |
| 60                             | 10.0 ± 7.4                           | 18.5 ± 11.5                        | 0.011   |
| 120                            | 12.6 ± 9.5                           | 20.7 ± 12.9                        | 0.035   |

Supplemental Table 3. Residence times and absorbed doses of liver.

|                                                 | Patient #* | Arm | Residence time (h) | Absorbed doses (mGy/MBq) |
|-------------------------------------------------|------------|-----|--------------------|--------------------------|
| Patients with<br>fulminant liver<br>diseases    | 1          | A   | 0.448              | 0.124                    |
|                                                 | 2          | B   | 0.536              | 0.147                    |
|                                                 | 7          | B   | 0.546              | 0.150                    |
|                                                 | 16         | B   | 0.719              | 0.196                    |
| Patients without<br>fulminant liver<br>diseases | 4          | B   | 0.092              | 0.028                    |
|                                                 | 5          | A   | 0.144              | 0.042                    |
|                                                 | 6          | A   | 0.172              | 0.050                    |
|                                                 | 9          | A   | 0.160              | 0.046                    |
|                                                 | 10         | A   | 0.165              | 0.048                    |
|                                                 | 11         | A   | 0.110              | 0.033                    |
|                                                 | 12         | B   | 0.198              | 0.052                    |
|                                                 | 13         | A   | 0.169              | 0.049                    |
|                                                 | 14         | A   | 0.181              | 0.052                    |
|                                                 | 15         | B   | 0.053              | 0.017                    |

\* Patient #3 and #8 were dropped out.
